# Supplementary figures and images for: Investigating the Approach of Socialization and Strengthening Social Interactions for Designing Residential Town of Engineers
Source: Preprints.org preprint supplement (doi:10.20944/preprints202104.0554.v1), 2021-04-20

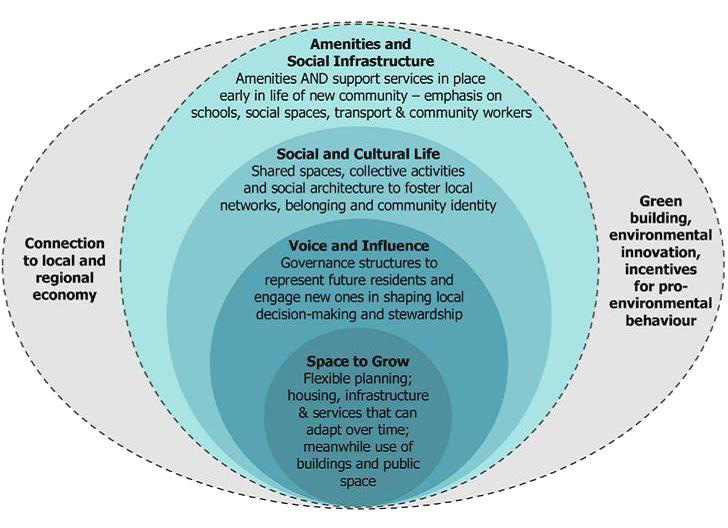


Figure 1: Graphic Interpretation of the Young Sustainable Social Design Framework (Woodcraft, 2011)

Supplement: Supplementary file 1 [file supplementary]
